# Supplementary material
Source: publisher figshare collection journal article supplement (https://tandf.figshare.com/ndownloader/files/22047390)

**Supporting Information**

**Hyperacmosins H-J, three new polycyclic polyprenylated acylphloroglucinol derivatives from *Hypericum acmosepalum***

Xue Wanga, Jia-Jia Wanga, Xin-Yue Suoa, Hao-Ran Suna, Bo Zhena, Hua Suna, Jian-Guang Lic*, Teng-Fei Jia,b*

aState Key Laboratory of Bioactive Substance and Function of Natural Medicines, Institute of Materia Medica, Chinese Academy of Medical Sciences and Peking Union Medical College, Beijing 100050, China; bKey Laboratory of Tibetan Medicine Research, Northwest Institute of Plateau Biology, Chinese Academy of Sciences, Xining 810008, China; cCollege of Pharmacy, Xinjiang Medical University, Urumqi 830011, China.

*Corresponding author. E-mail: [jitf@imm.ac.cn](mailto:jitf@imm.ac.cn) (T. F. Ji) [xjykdx_ljg@163.com](mailto:xjykdx_ljg@163.com) (J. G. Li)

CONTENTS

[**Hepatoprotection in Vitro Bioassays 4**](#_Toc27585124)

[**Table 1. Evaluation of compounds 1-7 (10 µM) for hepatoprotective effects against paracetamol-induced HepG2 cella 4**](#_Toc27585125)

[**1H NMR (400 MHz, CDCl3) and 13C NMR (125 MHz, CDCl3) data of compounds 4-7 5**](#_Toc27585126)

[**S1. HMBC correlations for 1, 2, and 3 5**](#_Toc27585127)

[**S2. Experimental ECD spectra of compounds 1-3 6**](#_Toc27585128)

[**S3. Compared ECD spectra of 1-2 8**](#_Toc27585129)

[**S4 HRESIMS of compound 1 8**](#_Toc27585130)

[**S5 UV spectrum of compound 1 9**](#_Toc27585131)

[**S6 IR spectrum of compound 1 9**](#_Toc27585132)

[**S7 1H NMR (400 MHz, CDCl3) of compound 1 10**](#_Toc27585133)

[**S8 1H NMR (400 MHz, DMSO) of compound 1 10**](#_Toc27585134)

[**S9 13C NMR (125 MHz, CDCl3) of compound 1 11**](#_Toc27585135)

[**S10 HSQC of compound 1 in CDCl3 11**](#_Toc27585136)

[**S11 HMBC of compound 1 in CDCl3 12**](#_Toc27585137)

[**S12 ROESY of compound 1 in CDCl3 12**](#_Toc27585138)

[**S13 ROESY of compound 1 in DMSO 13**](#_Toc27585139)

[**S14 ECD of compound 1 14**](#_Toc27585140)

[**S15 HRESIMS of compound 2 14**](#_Toc27585141)

[**S16 UV spectrum of compound 2 15**](#_Toc27585142)

[**S17 IR spectrum of compound 2 15**](#_Toc27585143)

[**S18 1H NMR (400 MHz, CDCl3 ) of compound 2 16**](#_Toc27585144)

[**S19 1H NMR (400 MHz, DMSO) of compound 2 16**](#_Toc27585145)

[**S20 13C NMR (125 MHz, CDCl3) of compound 2 17**](#_Toc27585146)

[**S21 HSQC of compound 2 in CDCl3 17**](#_Toc27585147)

[**S22 HMBC of compound 2 in CDCl3 18**](#_Toc27585148)

[**S23 ROESY of compound 2 in CDCl3 18**](#_Toc27585149)

[**S24 ROESY of compound 2 in DMSO 19**](#_Toc27585150)

[**S25 ECD of compound 2 19**](#_Toc27585151)

[**S26 HRESIMS of compound 3 20**](#_Toc27585152)

[**S27 UV spectrum of compound 3 20**](#_Toc27585153)

[**S28 IR spectrum of compound 3 21**](#_Toc27585154)

[**S29 1H NMR (400 MHz, CDCl3) of compound 3 22**](#_Toc27585155)

[**S30 13C NMR (125 MHz, CDCl3) of compound 3 22**](#_Toc27585156)

[**S31 HSQC of compound 3 in CDCl3 23**](#_Toc27585157)

[**S32 HMBC of compound 3 in CDCl3 23**](#_Toc27585158)

[**S33 ROESY of compound 3 in CDCl3 24**](#_Toc27585159)

[**S34 ECD of compound 3 24**](#_Toc27585160)

## Hepatoprotection in Vitro Bioassays

Hepatoprotection effects of compounds **1-7** were determined by a (MTT) colorimetric assay in HepG2 cells. Each cell suspension of 2 × 104 cells in 200 *µ*L of RPMI 1640 containing fetal calf serum (10%), penicillin (100 U/mL), and streptomycin (100 *µ*g/mL) was placed in a 96-well microplate and pre-cultured for 24 h at 37 °C under a 5% CO2 atmosphere. Fresh medium (100 *µ*L) containing bicyclol and test samples was added, and the cells were cultured for 1 h. The cultured cells were exposed to 8 mM paracetamol for 24 h. Then, 100 *µ*L of 0.5 mg/mL MTT was added to each well after the withdrawal of the culture medium and incubated for an additional 4 h. The resulting formazan was dissolved in 150 *µ*L of DMSO after aspiration of the culture medium. The optical density (OD) of the formazan solution was measured on a microplate reader at 570 nm. Inhibition (%) was obtained by the following formula: Inhibition (%) = [(OD (sample) - OD (control)) /(OD (normal) - OD (control))] × 100.

## Table 1. Evaluation of compounds 1-7 (10 µM) for hepatoprotective effects against paracetamol-induced HepG2 cella

| compound | OD value | cell viability  (% of normal) | Inhibition  (% of control) |
| --- | --- | --- | --- |
| normal | 1.128±0.036 | 100.00 |  |
| control | 0.628±0.021 | 55.61*c* |  |
| bicyclol*b* | 0.678±0.020 | 60.12*#* | 8.11 |
| **1** | 0.681±0.015 | 60.38*##* | 8.58 |
| **2** | 0.610±0.020 | 54.06 | -2.78 |
| **3** | 0.637±0.013 | 56.45 | 1.51 |
| **4** | 0.603±0.038 | 53.41 | -3.95 |
| **5** | 0.695±0.020 | 61.56*##* | 10.70 |
| **6** | 0.657±0.012 | 58.20 | 4.65 |
| **7** | 0.598±0.012 | 53.00 | -4.69 |
| *a*Results are expressed as the means ± SD (n = 3; for normal and control, n = 6); *b*Positive control (10*μ*M). *cp* < 0.001 vs normal. *#p* < 0.05, *##p* < 0.01 vs control. | | | |

## 1H NMR (400 MHz, CDCl3) and 13C NMR (125 MHz, CDCl3) data of compounds 4-7

**Compound 4：**13C NMR (125 MHz, CDCl3), *δ* (ppm): 79.7, 188.2, 117.1, 176.1, 51.0, 40.1, 43.3, 48.9, 206.8, 193.9, 137.1, 128.0, 127.9, 132.0, 127.9, 128.0, 27.6, 92.7, 72.1, 24.8, 23.9, 15.3, 27.4, 122.3, 133.6, 25.9, 18.0, 13.8, 36.6, 25.3, 124.6, 131.2, 25.7, 17.7.

1H NMR (400 MHz, CDCl3), *δ* (ppm), *J* (Hz): 2.03 dd (13.6, 4.0); 1.50 m, 1.83 m, 7.48 d (7.4), 7.23 t (7.4), 7.38 t (7.4), 7.23 t (7.4), 7.48 d (7.4), 3.08 dd (15.2, 10.6); 2.87 dd (15.2, 7.0), 4.88 dd (10.6, 6.8), 1.31 s, 1.26 s, 1.38 s, 2.17 m; 1.85 m, 4.99 t (5.4), 1.72 s, 1.59 s, 1.14 s, 2.12 m; 1.54 m, 2.25 m; 1.98 m, 5.08 t (7.0), 1.64 s, 1.62 s.

**Compound 5:**13C NMR (125 MHz, CDCl3), *δ*(ppm): 79.8, 188.2, 116.7, 176.1, 51.0, 39.8, 43.6, 49.2, 206.7, 194.1, 137.1, 128.0, 128.0, 132.0, 128.0, 128.0, 27.7, 92.5, 72.2, 24.8, 23.5, 15.4, 27.1, 122.4, 133.8, 25.8, 17.9, 13.7, 36.6, 25.3, 124.5, 131.3, 25.7, 17.7.

1H NMR (400 MHz, CDCl3), *δ* (ppm), *J* (Hz): 2.01 d (4.0); 1.53 m, 1.76 m, 7.52 d (7.4), 7.29 t (7.4), 7.40 t (7.4), 7.29 t (7.4), 7.52 d (7.4), 3.01 dd (15.2, 10.6); 2.90 dd (15.2, 7.6), 4.87 dd (10.6, 7.6), 1.29 s, 1.24 s, 1.37 s, 2.18 m; 1.82 m, 4.97 t (7.0), 1.68 s, 1.58 s, 1.14 s, 2.12 m; 1.49 m, 2.26 m; 1.98 m, 5.08 t (7.0), 1.64 s, 1.62 s.

**Compound 6:**13C NMR (125 MHz, CDCl3), *δ* (ppm): 70.9, 172.0, 118.9, 190.4, 60.8, 41.9, 41.9, 48.6, 207.4, 193.6, 138.2, 127.8, 128.6, 132.6, 128.6, 127.8, 26.4, 93.8, 70.3, 26.5, 23.9, 16.0, 28.0, 122.1, 133.6, 25.9, 18.0, 14.9, 37.9, 24.3, 124.2, 131.7, 25.7, 17.7.

1H NMR (400 MHz, CDCl3), *δ* (ppm), *J* (Hz): 2.04 dd (13.6, 4.4); 1.41 dd (13.4, 12.6), 1.86 m, 7.55 d (7.4), 7.38 t (7.4), 7.50 t (7.4), 7.38 t (7.4), 7.55 d (7.4), 2.97 dd (13.6, 8.8); 2.91 dd (13.6, 9.2), 4.62 t (10.2), 0.87 s, 0.92 s, 1.34 s, 2.13 m; 1.79 m, 4.99 m, 1.69 s, 1.58 s, 1.28 s, 2.04 m; 1.75 m, 2.13 m; 1.96 m, 5.01 m, 1.66 s, 1.59 s.

**Compound 7:**13C NMR (125 MHz, CDCl3), *δ* (ppm): 70.9, 172.0, 118.9, 190.4, 60.8, 41.9, 41.9, 48.6, 207.4, 193.6, 138.2, 127.8, 128.6, 132.6, 128.6, 127.8, 26.4, 93.8, 70.3, 26.5, 23.9, 16.0, 28.0, 122.1, 133.6, 25.9, 18.0, 14.9, 37.9, 24.3, 124.2, 131.7, 25.7, 17.7.

1H NMR (400 MHz, CDCl3), *δ* (ppm), *J* (Hz): 1.99 m; 1.38 m, 1.76 m, 7.57 d (7.4), 7.32 t (7.4), 7.45 t (7.4), 7.32 t (7.4), 7.57 d (7.4), 3.02 dd (15.0, 9.8); 2.84 dd (15.0, 10.2), 4.15 t (10.0), 1.14 s, 1.12 s, 1.30 s, 2.14 m; 1.74 m, 4.95 t (6.2), 1.68 s, 1.56 s, 1.24 s, 1.95 m; 1.48 m, 2.33 m; 2.08 m, 5.02 t (6.8), 1.66 s, 1.63 s.

S1. HMBC correlations for 1, 2, and 3

S2. Experimental ECD spectra of compounds 1-3


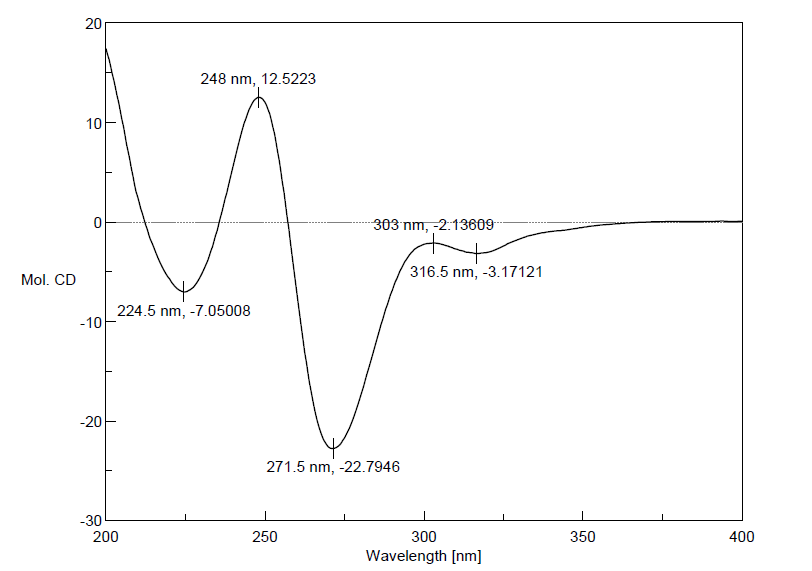


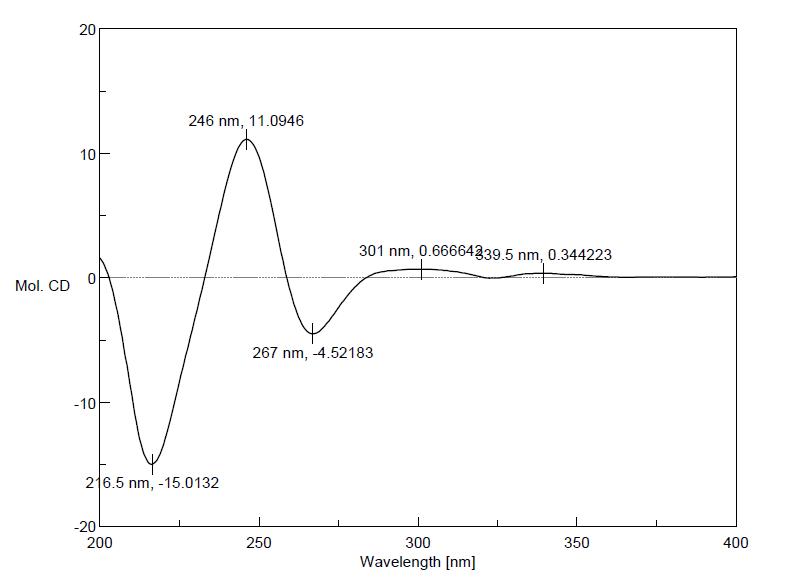


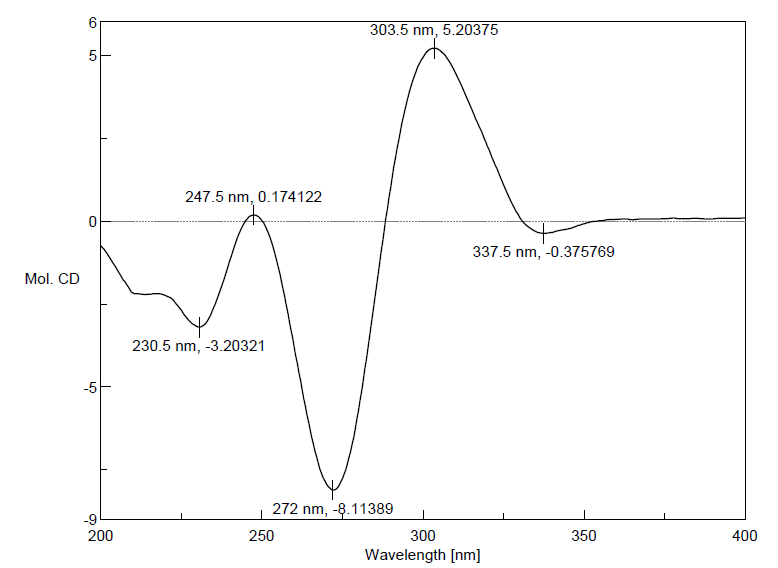


S3. Compared ECD spectra of 1-2


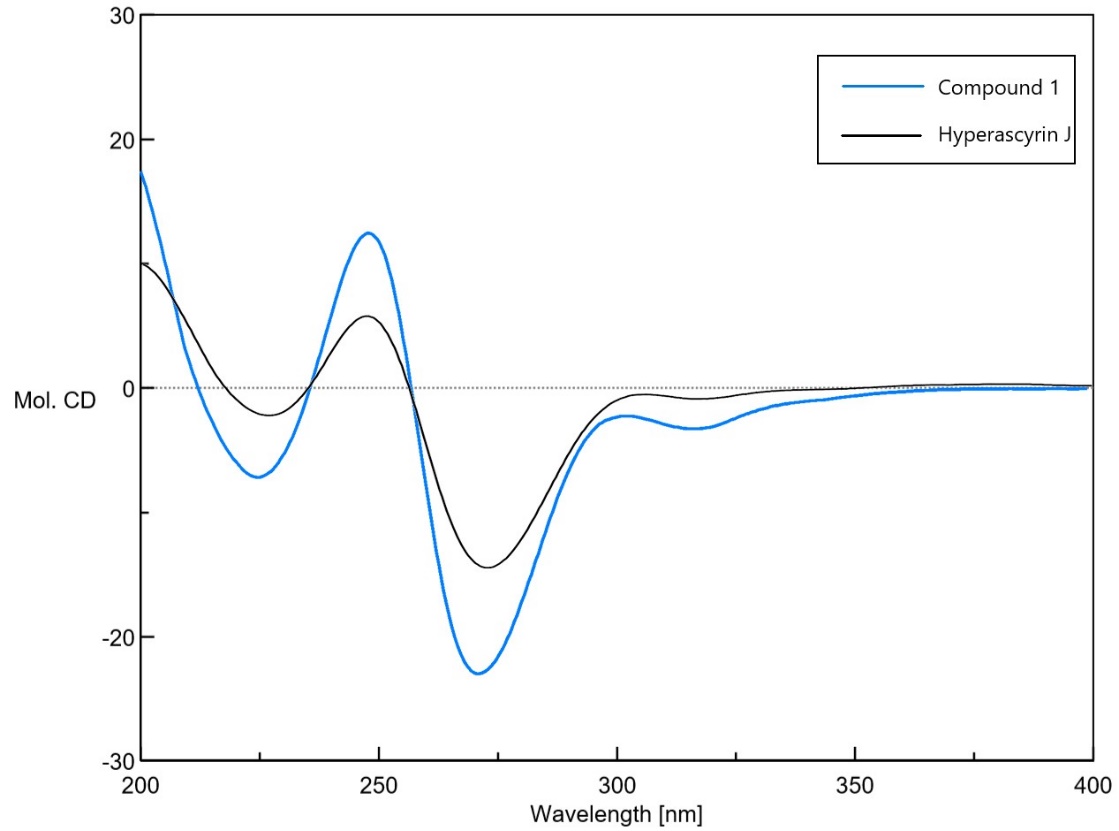


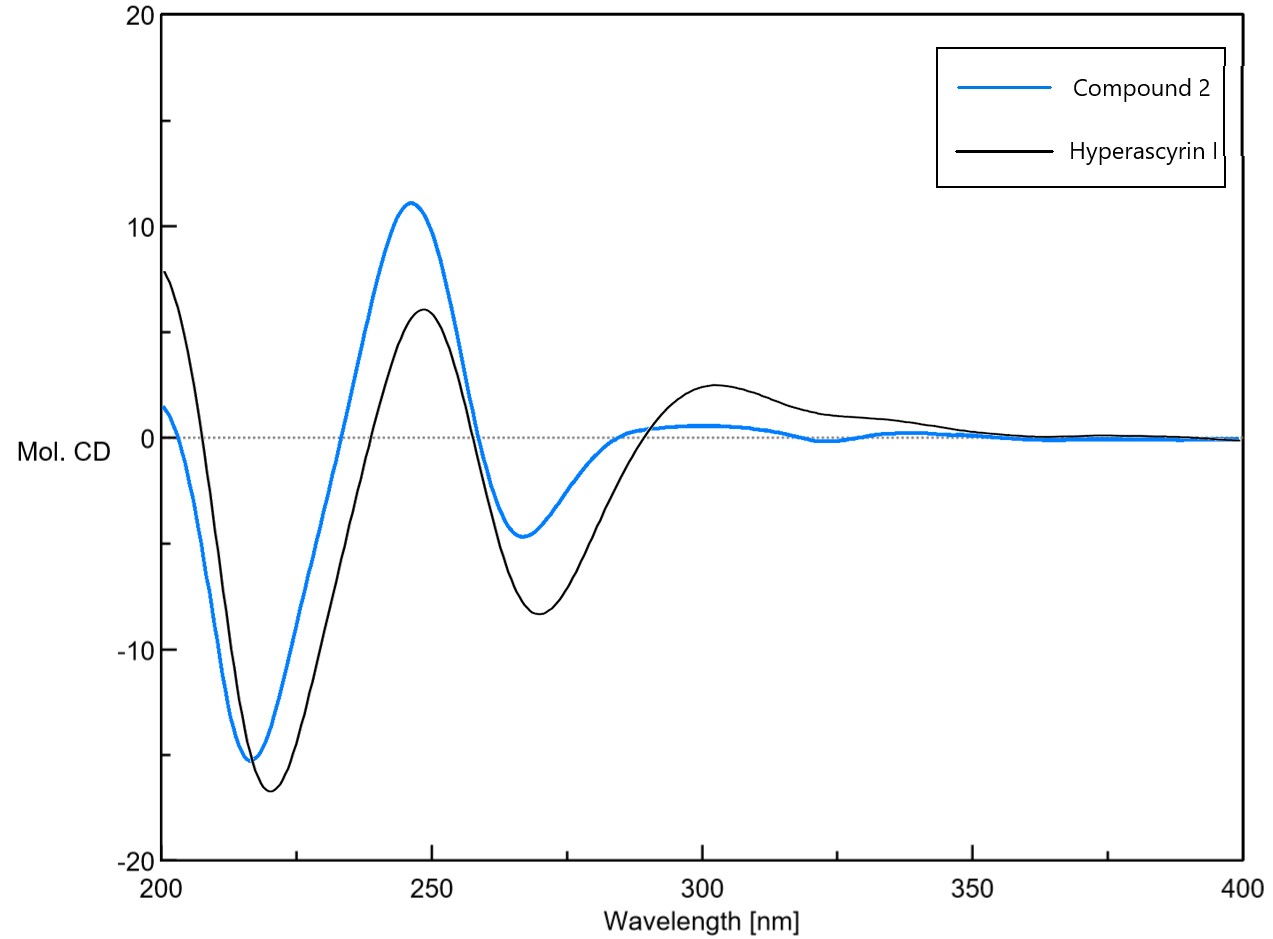


S4 HRESIMS of compound 1


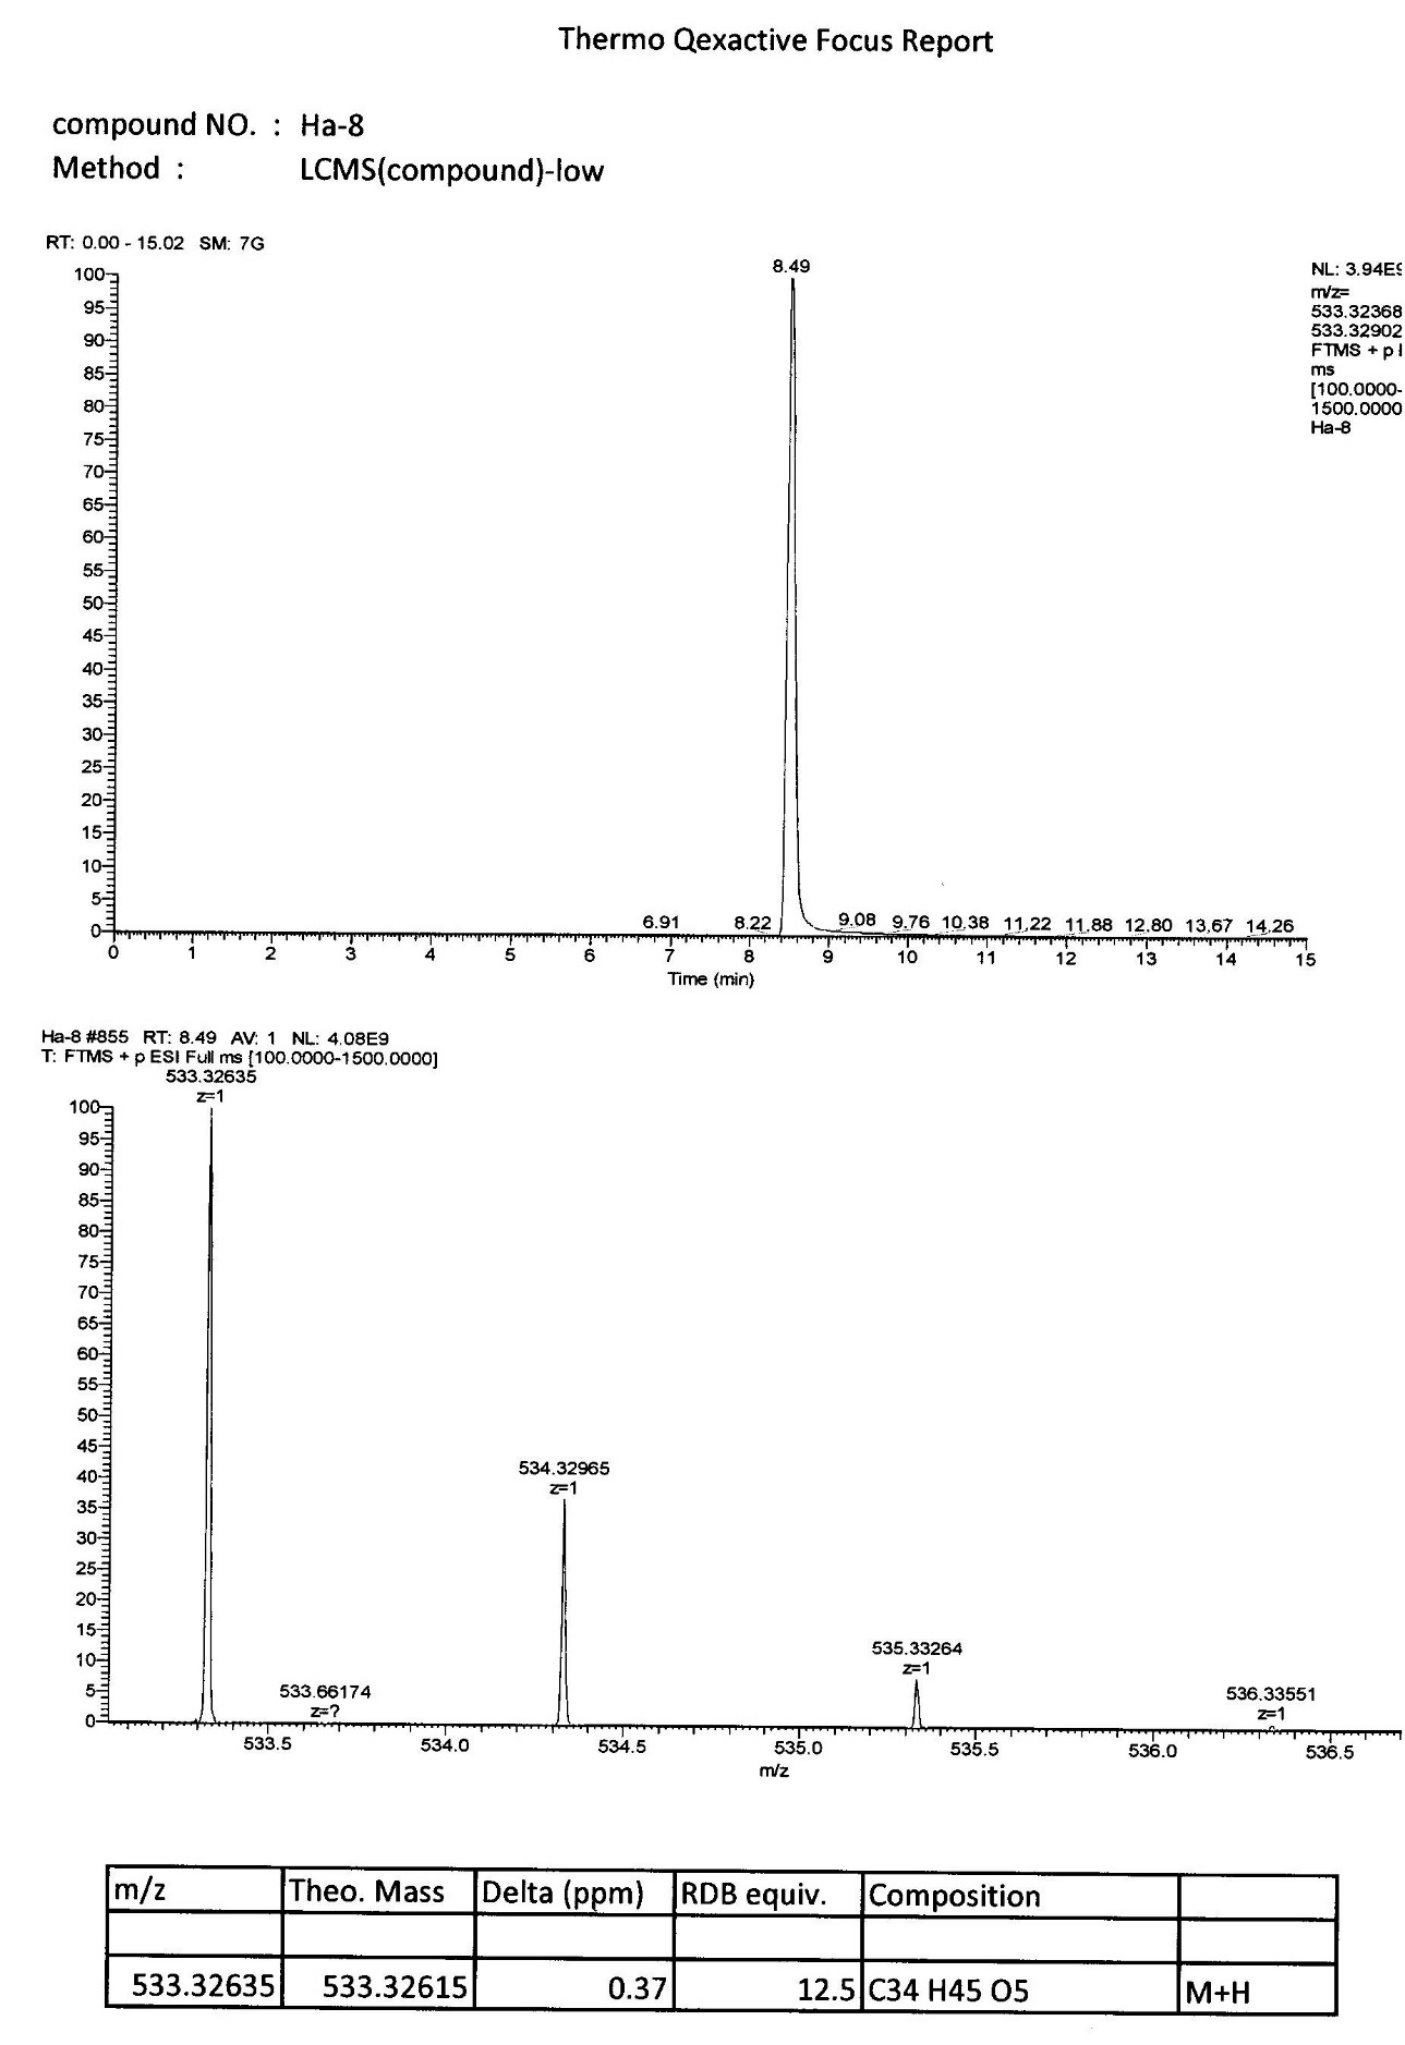


S5 UV spectrum of compound 1

**
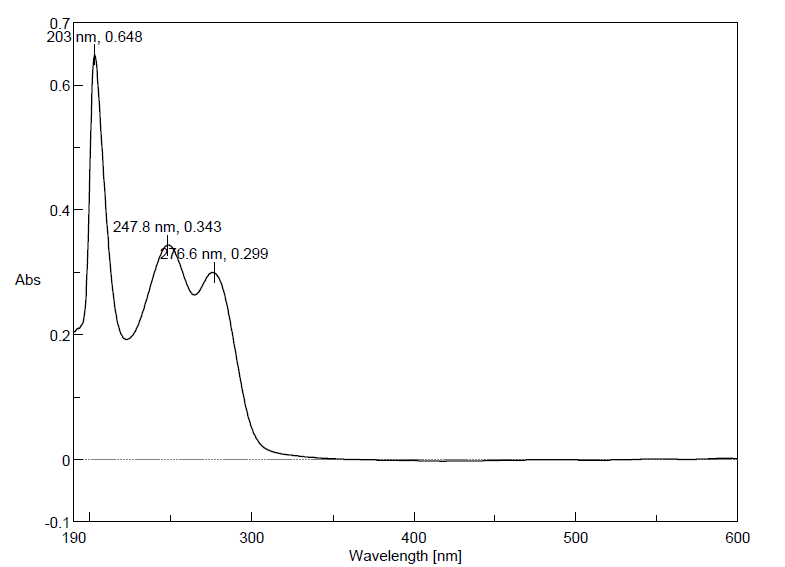
**

S6 IR spectrum of compound 1


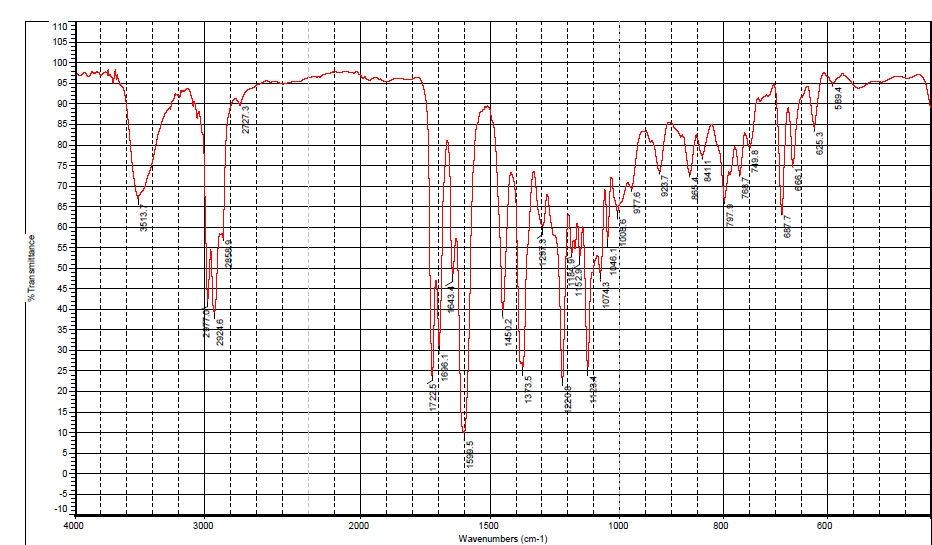


S7 1H NMR (400 MHz, CDCl3) of compound 1

S8 1H NMR (400 MHz, DMSO) of compound 1

S9 13C NMR (125 MHz, CDCl3) of compound 1

S10 HSQC of compound 1 in CDCl3

S11 HMBC of compound 1 in CDCl3

S12 ROESY of compound 1 in CDCl3

S13 ROESY of compound 1 in DMSO

S14 ECD of compound 1


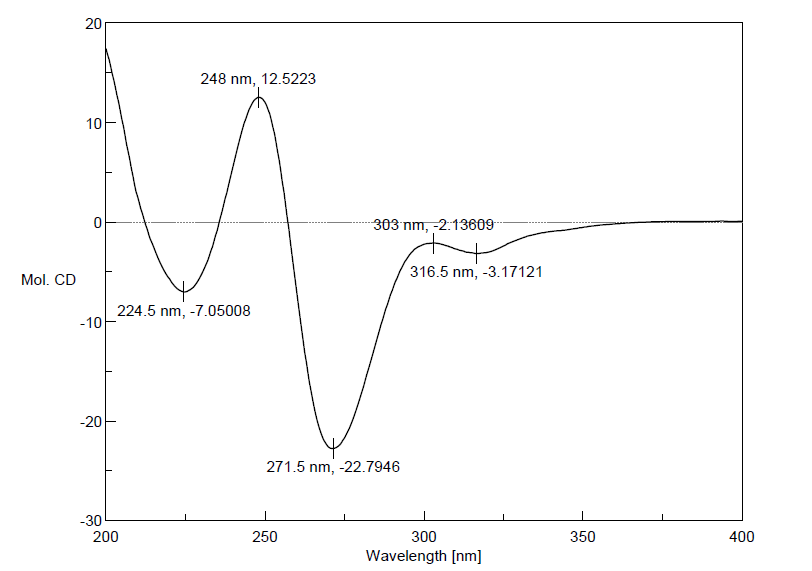


S15 HRESIMS of compound 2


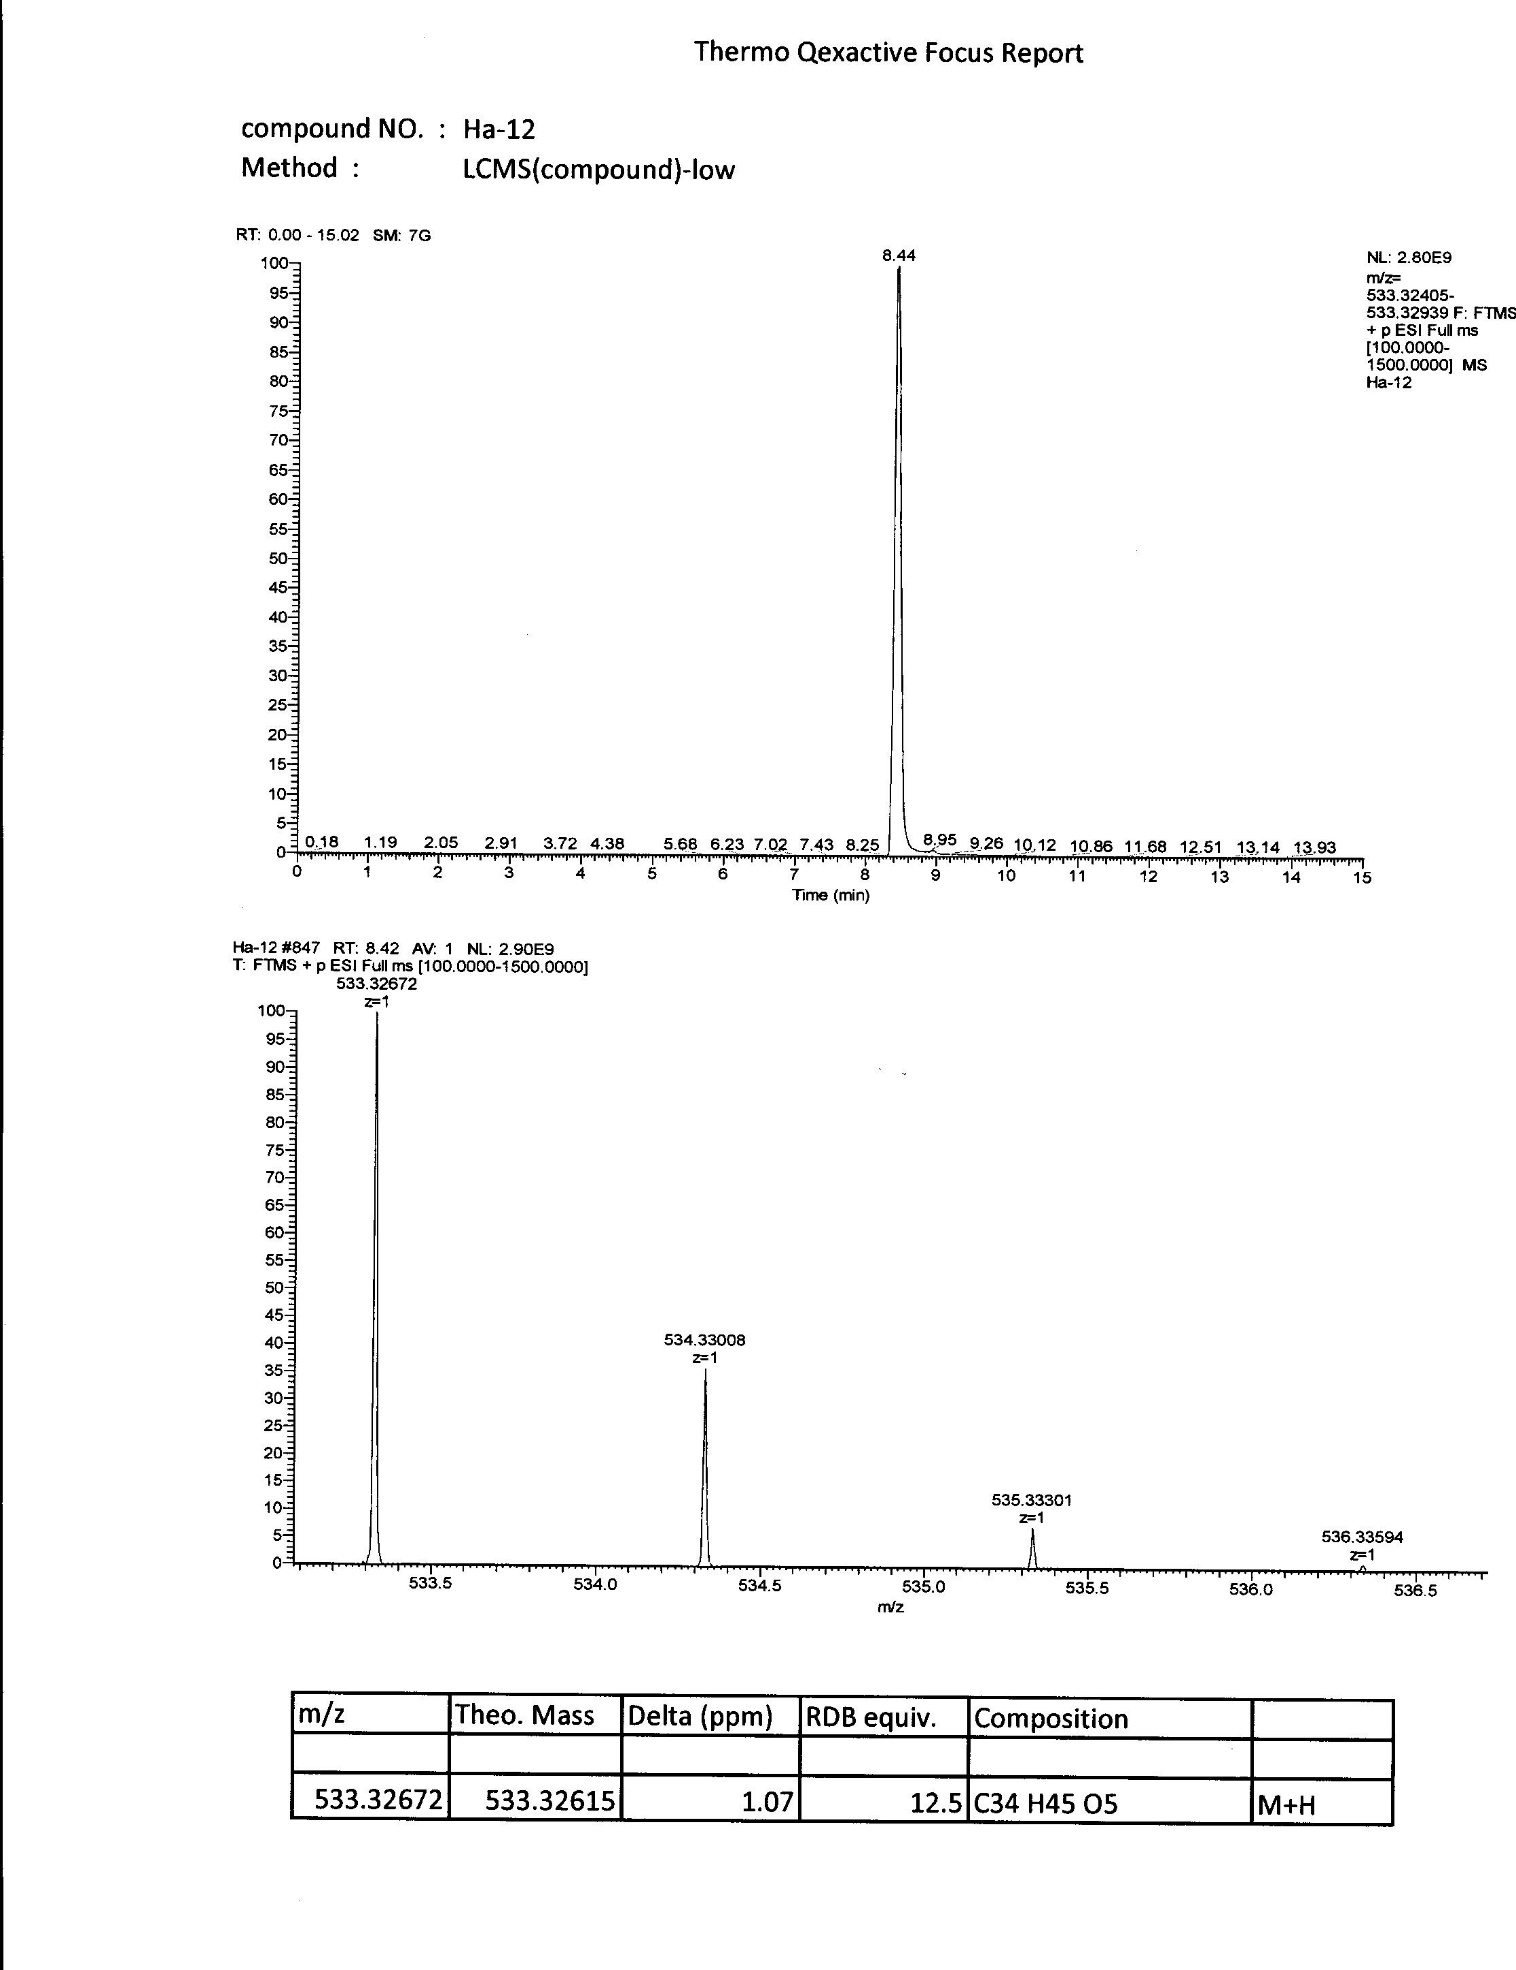


S16 UV spectrum of compound 2

**
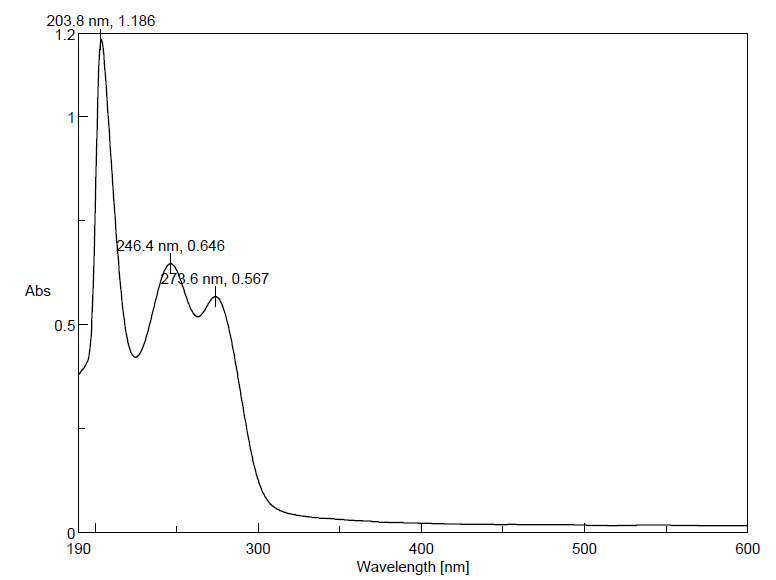
**

S17 IR spectrum of compound 2


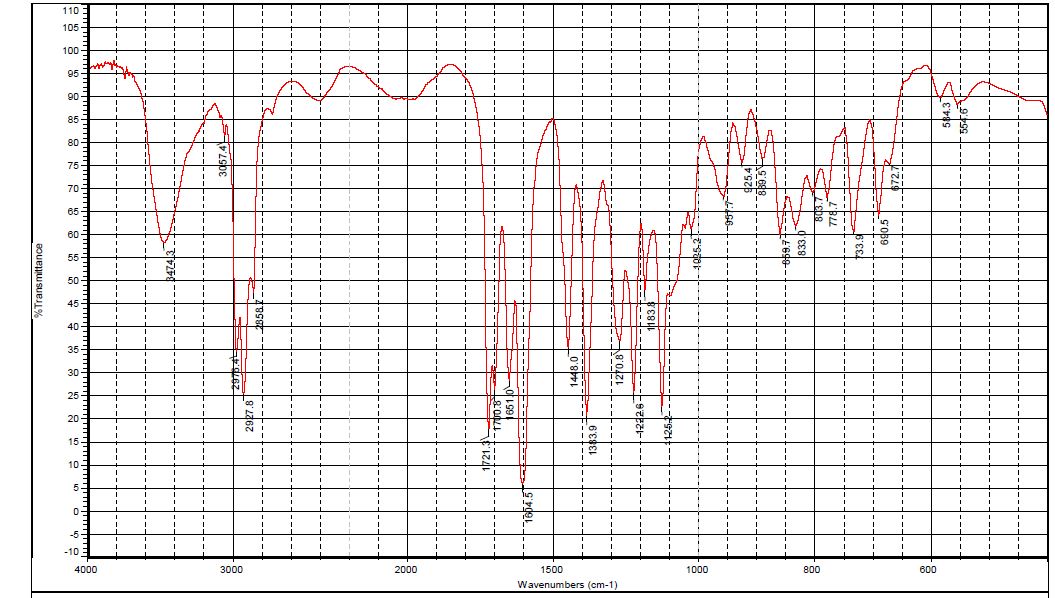


S18 1H NMR (400 MHz, CDCl3 ) of compound 2

S19 1H NMR (400 MHz, DMSO) of compound 2

S20 13C NMR (125 MHz, CDCl3) of compound 2

S21 HSQC of compound 2 in CDCl3

S22 HMBC of compound 2 in CDCl3

S23 ROESY of compound 2 in CDCl3

S24 ROESY of compound 2 in DMSO

S25 ECD of compound 2


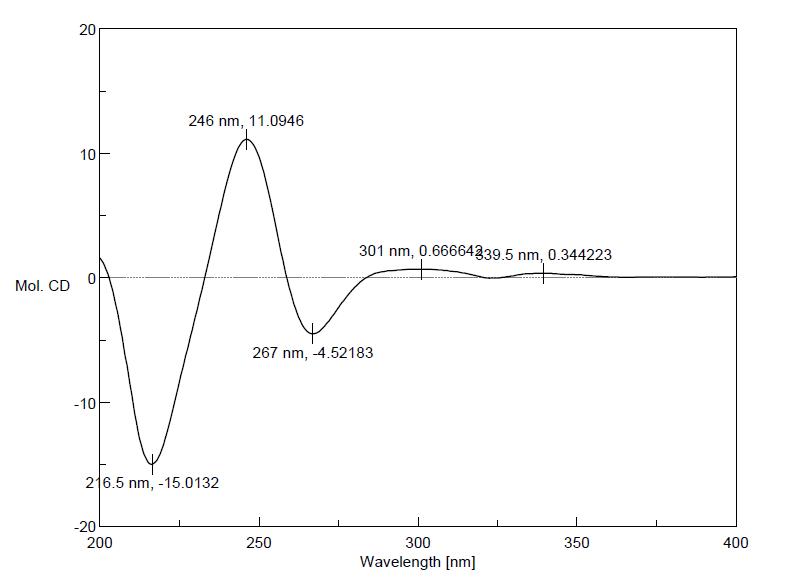


S26 HRESIMS of compound 3


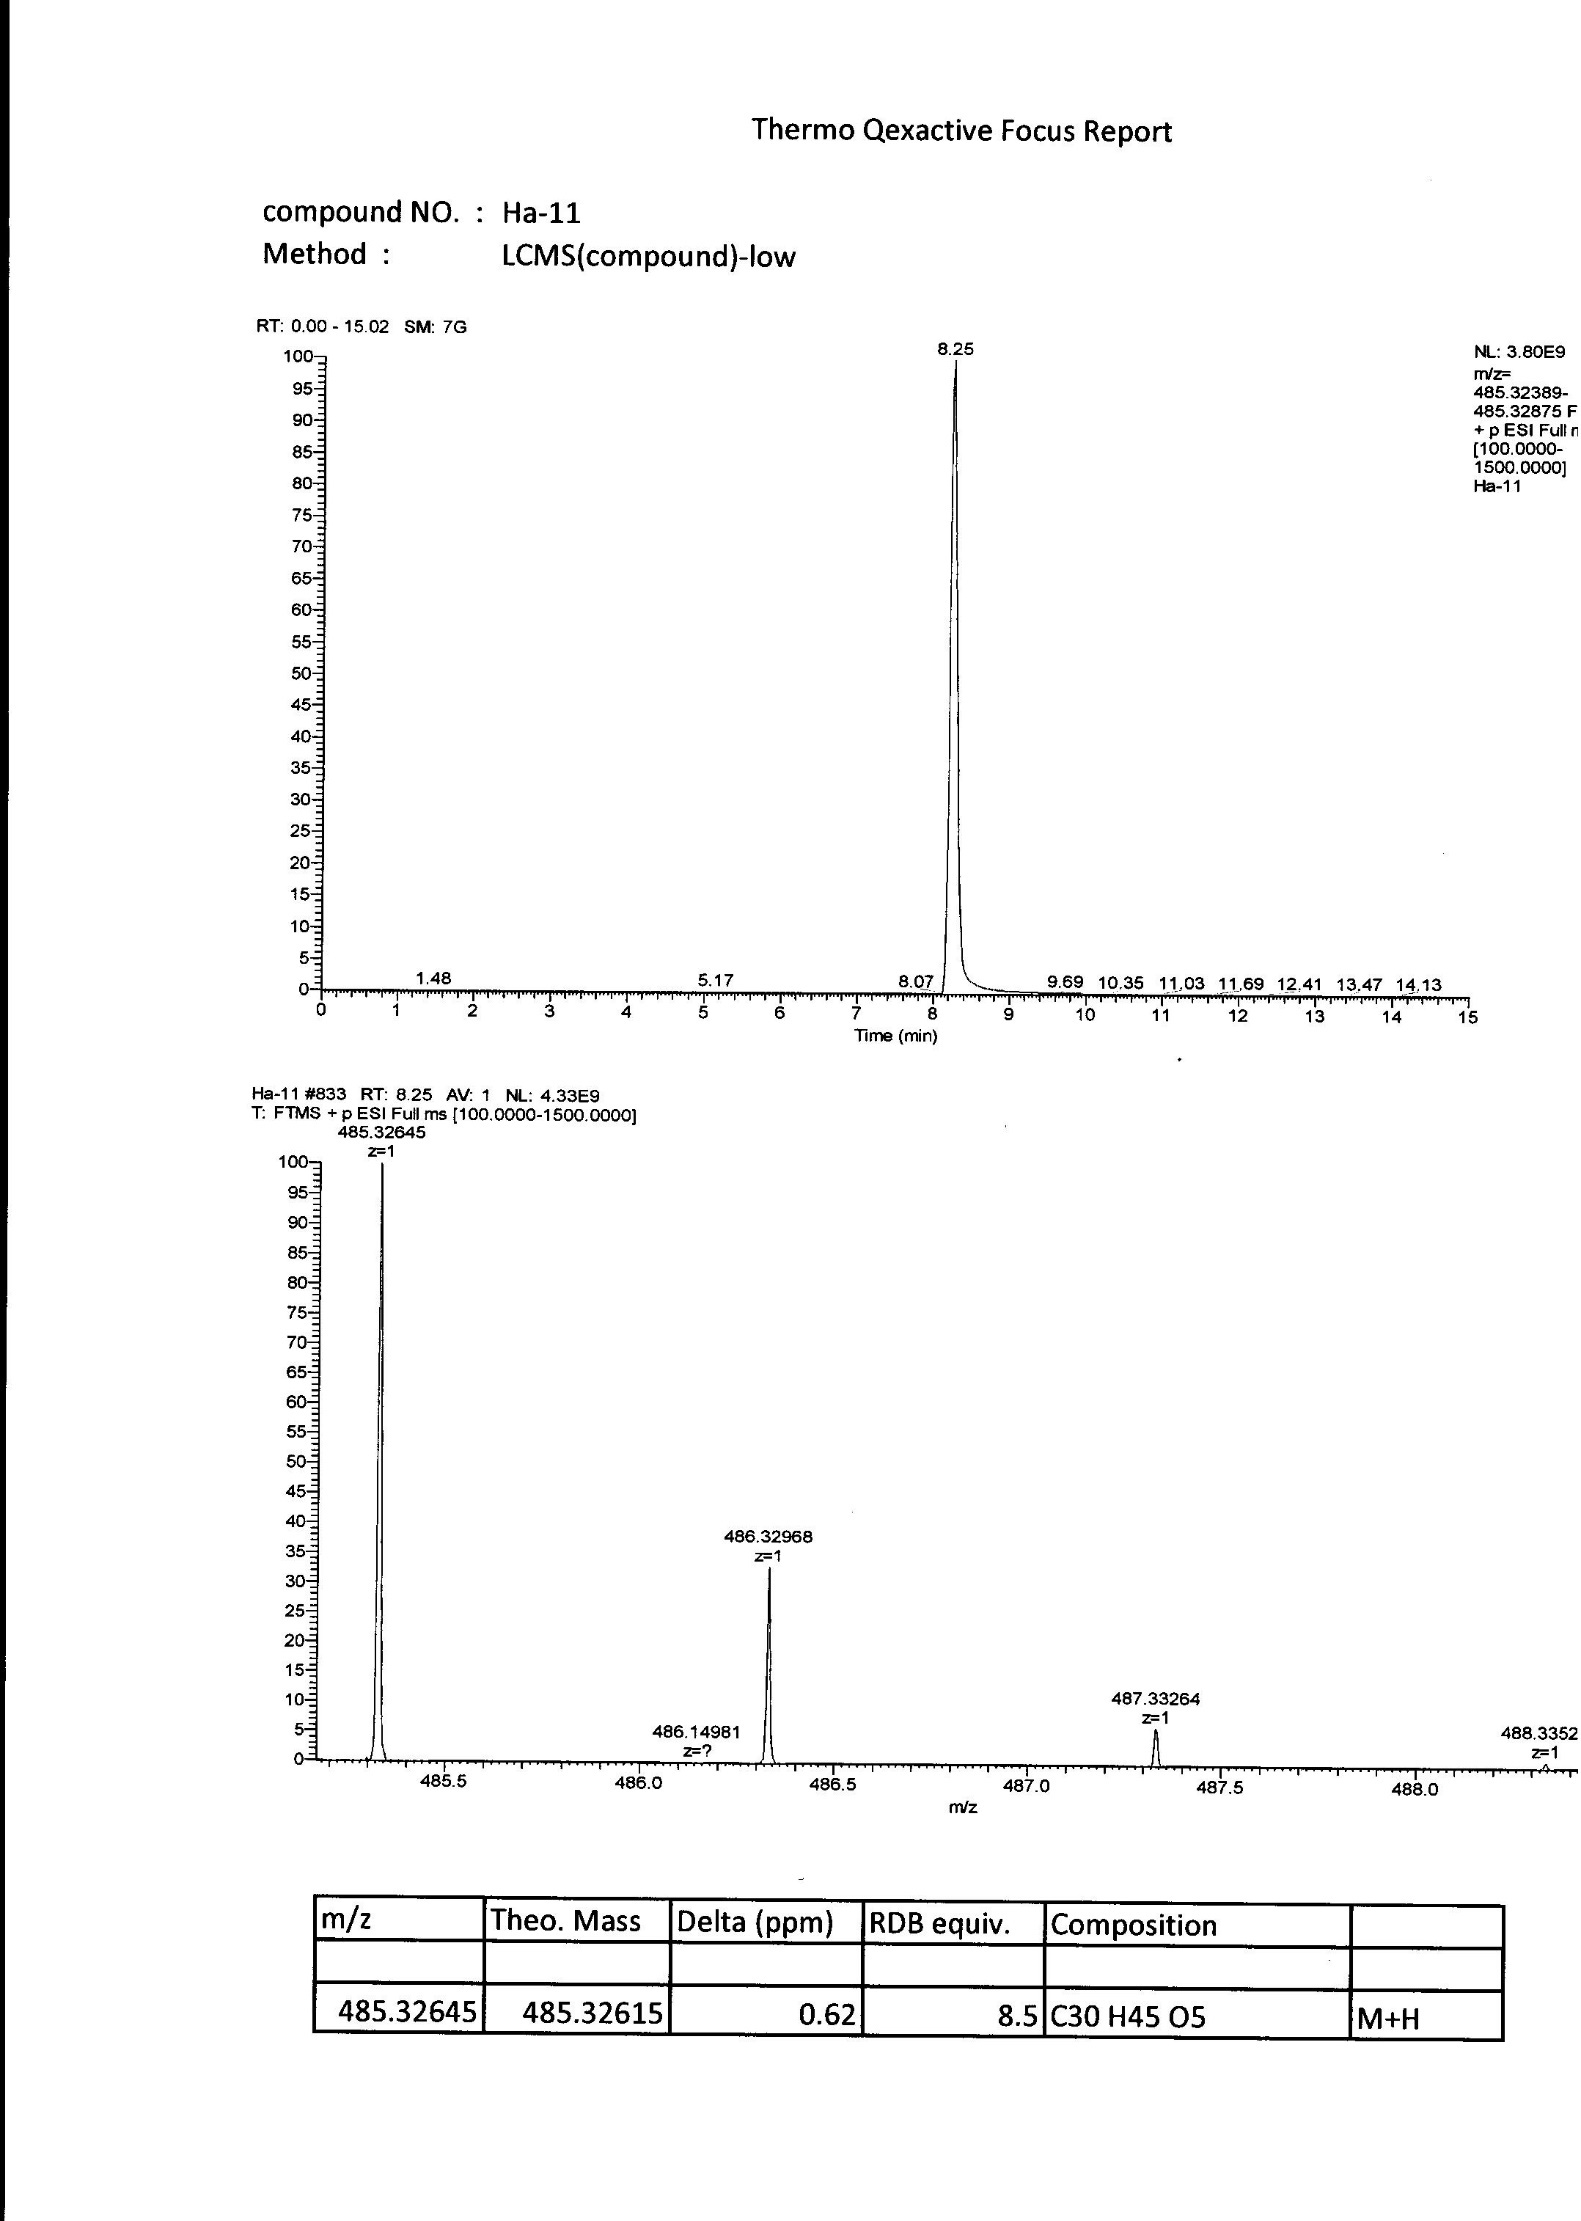


S27 UV spectrum of compound 3


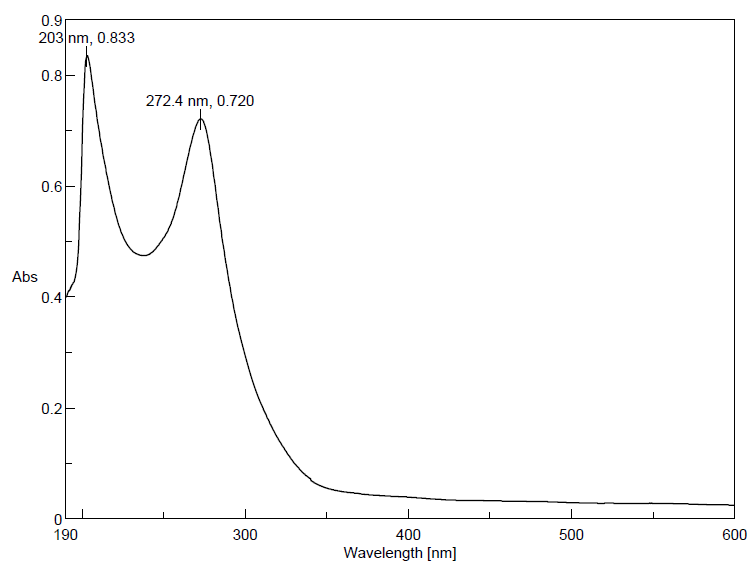


S28 IR spectrum of compound 3


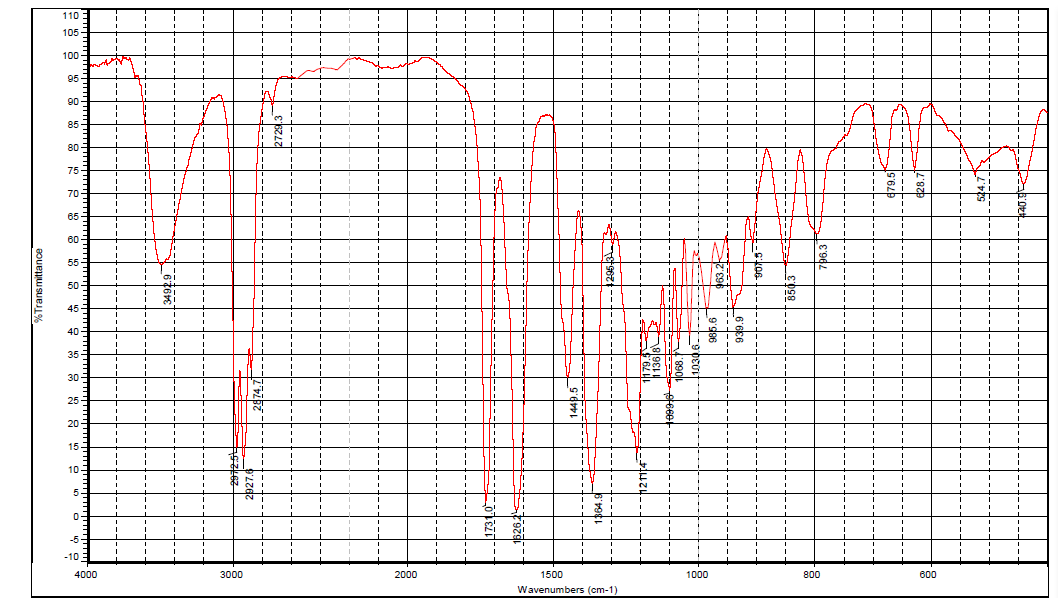


S29 1H NMR (400 MHz, CDCl3) of compound 3

S30 13C NMR (125 MHz, CDCl3) of compound 3

S31 HSQC of compound 3 in CDCl3

S32 HMBC of compound 3 in CDCl3

S33 ROESY of compound 3 in CDCl3

S34 ECD of compound 3


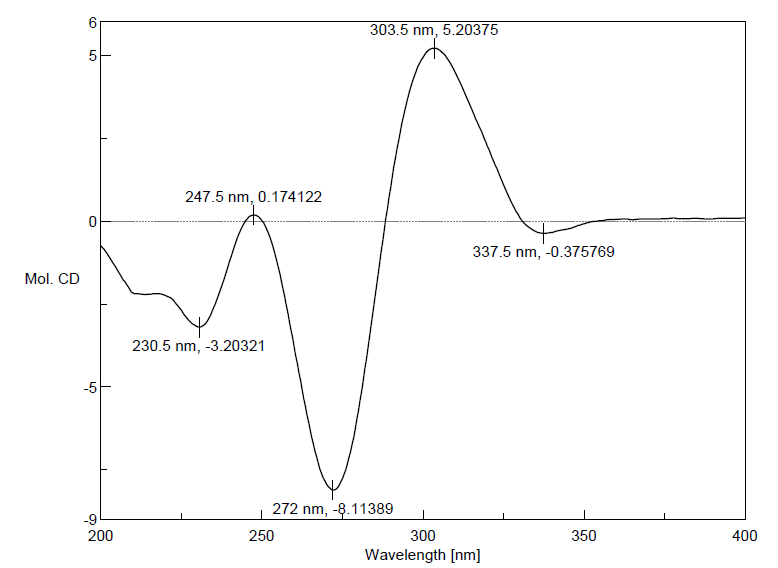

Supplement: Supplementary file 1 [file 22047390]
